# Supplementary material for: Real-Time Measurement of Volatile Chemicals Released by Bed Bugs during Mating Activities
Source: PubMed Central journal article supplement (PMC3515544; doi:10.1371/journal.pone.0050981), 2012-12-05

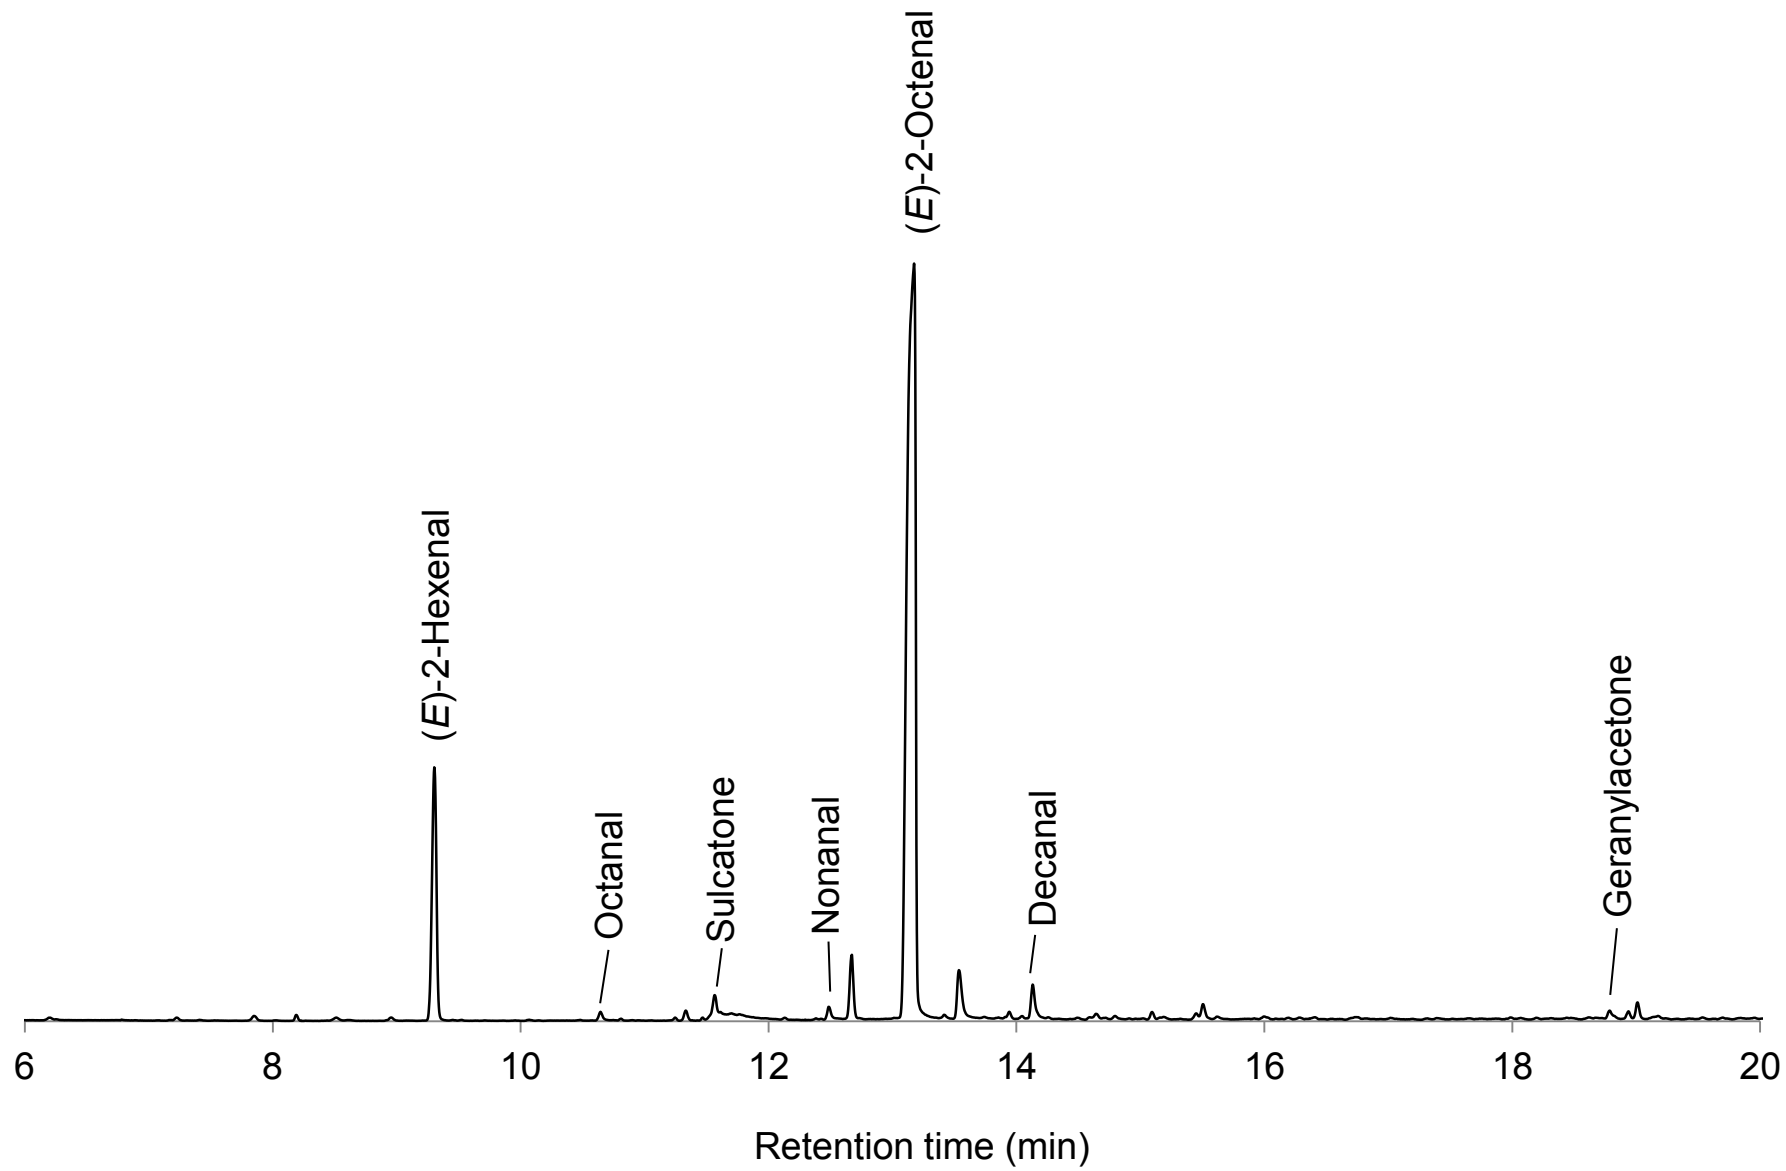

Supplement: pone.0050981.s001.pdf [file pone.0050981.s001.pdf]
